# Supplementary material for: Dietary nitrate attenuates renal ischemia-reperfusion injuries by modulation of immune responses and reduction of oxidative stress
Source: PubMed Central journal article supplement — Redox Biol. 2017 Jun 9;13:320–30. doi: 10.1016/j.redox.2017.06.002 (PMC5473548; doi:10.1016/j.redox.2017.06.002), 2017-06-09
Supplement: mmc1.pdf [file mmc1.pdf]

**Dietary nitrate attenuates renal ischemia-reperfusion injuries by modulation of  
immune responses and reduction of oxidative stress**

Ting Yang<sup>1\*#</sup>, Xing-Mei Zhang<sup>2</sup>, Laura Tarnawski<sup>3</sup>, Maria Peleli<sup>1</sup>, Zhengbing Zhuge<sup>1</sup>, Niccolo Terrando<sup>1\*</sup>, Robert A. Harris<sup>2</sup>, Peder S. Olofsson<sup>3</sup>, Erik Larsson<sup>4</sup>, A. Erik G. Persson<sup>1,5</sup>, Jon O. Lundberg<sup>1</sup>, Eddie Weitzberg<sup>1</sup>, Mattias Carlstrom<sup>1#</sup>

<sup>1</sup> Dept. of Physiology and Pharmacology, Karolinska Institutet, Stockholm, Sweden

<sup>2</sup> Dept. of Clinical Neuroscience, Karolinska Institutet, Center for Molecular Medicine, Karolinska University Hospital Solna, Stockholm, Sweden

<sup>3</sup> Dept. of Medicine, Center for Molecular Medicine, Solna, Karolinska Institutet, Karolinska University Hospital, Stockholm, Sweden

<sup>4</sup> Dept. of Immunology, Genetics and Pathology, Uppsala University, Sweden

<sup>5</sup> Dept. of Medical Cell Biology, Uppsala University, Sweden

\*Authors current institution: Dept. of Medicine, Div. of Nephrology (T.Y.), Dept. of Anesthesiology (N.T.), Duke University Medical Center, Durham, NC, USA

# Corresponding authors

**Correspondence to:**

Ting Yang (MD, PhD)

Department of Physiology and Pharmacology, Karolinska Institutet  
Nanna Svartz Väg 2, 17177 Stockholm, Sweden

Email: [ting.yang2@duke.edu](mailto:ting.yang2@duke.edu)

Mattias Carlström (PharmD, PhD)

Associate Professor of Physiology

Department of Physiology and Pharmacology, Karolinska Institutet  
Nanna Svartz Väg 2, 17177 Stockholm, Sweden

Email: [mattias.carlstrom@ki.se](mailto:mattias.carlstrom@ki.se)

**Figure S1. Experimental protocol**

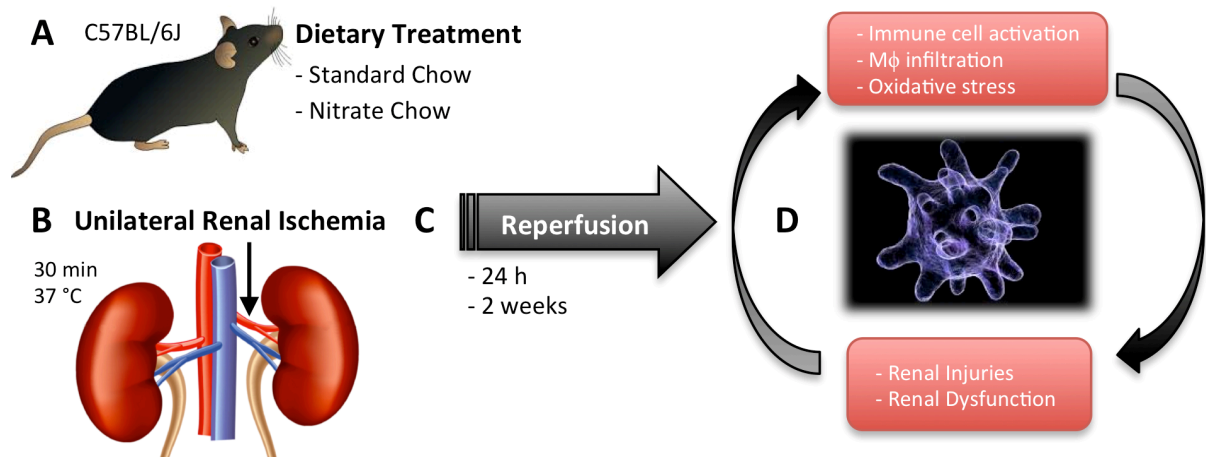

Adult male mice (C57BL/6J) were fed with regular or nitrate-supplemented chow for two weeks (**A**), which was followed by unilateral ischemia of the left kidney (**B**). The reperfusion time, before termination, was 24 hours or two weeks (**C**). Renal function determined by renal plasma flow (RPF) and glomerular filtration rate (GFR) was assessed *in vivo*, and at the end of the reperfusion period plasma, tissues and bone-marrow-derived macrophages were collected for analyses of kidney injuries, oxidative stress (NADPH oxidase-derived  $O_2^{\bullet-}$  generation), immune cell activation (cytokines in plasma and in kidney) and infiltration of macrophages (Mφ) in the kidney, and finally the phenotype of bone marrow-derived macrophages was characterized (**D**).
